# Supplementary material
Source: Springer Nature journal article supplement (https://www.springermedizin.de/resource/supplementary/13063_2010_506_MOESM3_ESM.pdf/9618364)
Supplement: MOESM3 [file 9618364]

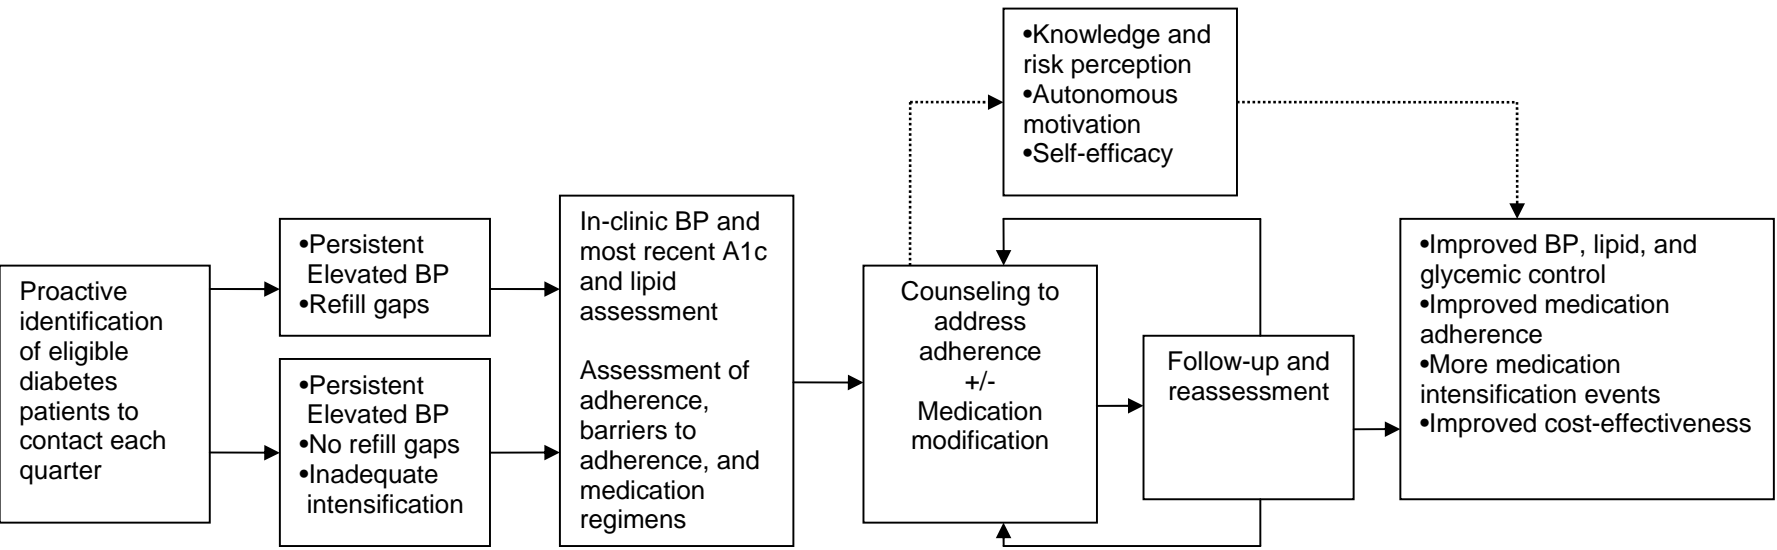

Proactive identification of eligible diabetes patients to contact each quarter

- Persistent Elevated BP
- Refill gaps

- Persistent Elevated BP
- No refill gaps
- Inadequate intensification

In-clinic BP and most recent A1c and lipid assessment

Assessment of adherence, barriers to adherence, and medication regimens

Counseling to address adherence +/- Medication modification

Follow-up and reassessment

- Improved BP, lipid, and glycemic control
- Improved medication adherence
- More medication intensification events
- Improved cost-effectiveness

- Knowledge and risk perception
- Autonomous motivation
- Self-efficacy
